# Supplementary material for: Siberian Ibex Capra sibirica Respond to Climate Change by Shifting to Higher Latitudes in Eastern Pamir
Source: MDPI journal article supplement (doi:10.3390/d14090750), 2022-09-11
Supplement: s1 [file s1]

**Table S1.** The number of line transects per month for each year (2018 - 2021) during the survey.

| Year | June | July | August | September | October | November |
|------|------|------|--------|-----------|---------|----------|
| 2018 | 4    | 4    | 5      | 4         | 3       | 3        |
| 2019 | 3    | 5    | 4      | 4         | 4       | 3        |
| 2020 | 4    | 5    | 4      | 3         | 4       | 3        |
| 2021 | 4    | 5    | 5      | 4         | 2       | 3        |

**Table S2.** Ranking of variables' importance affecting the distribution of Siberian ibex in Taxkorgan Nature Reserve.

| Ranking | Variables                           | relative importance |
|---------|-------------------------------------|---------------------|
| 1       | Precipitation seasonality           | 0.30                |
| 2       | Precipitation of wettest month      | 0.20                |
| 3       | Human Influence Index               | 0.18                |
| 4       | NDVI                                | 0.15                |
| 5       | Elevation                           | 0.13                |
| 6       | Temperature seasonality             | 0.11                |
| 7       | Mean temperature of wettest quarter | 0.08                |
| 8       | Ruggedness                          | 0.07                |
| 9       | Mean temperature of driest quarter  | 0.02                |
| 10      | Isothermality                       | 0.02                |
| 11      | Distance to water                   | 0.01                |
| 12      | Land cover                          | 0.01                |
| 13      | Precipitation of driest month       | 0.01                |
| 14      | Slope                               | 0.01                |
| 15      | Aspect                              | 0.01                |

**Table S3.** The evaluation of ensemble species distribution models (eSDMs, including AUC and TSS) of Siberian ibex in Taxkorgan Nature Reserve under current and different climate change scenarios. AUC and TSS have no units.

| Period  | Future scenarios | Model evaluation |      |
|---------|------------------|------------------|------|
|         |                  | AUC              | TSS  |
| Current | -                | 0.94             | 0.77 |
|         | RCP2.6           | 0.94             | 0.78 |
| 2050    | RCP4.5           | 0.94             | 0.80 |
|         | RCP8.5           | 0.95             | 0.79 |
| 2070    | RCP2.6           | 0.95             | 0.79 |
|         | RCP4.5           | 0.95             | 0.81 |
|         | RCP8.5           | 0.95             | 0.79 |

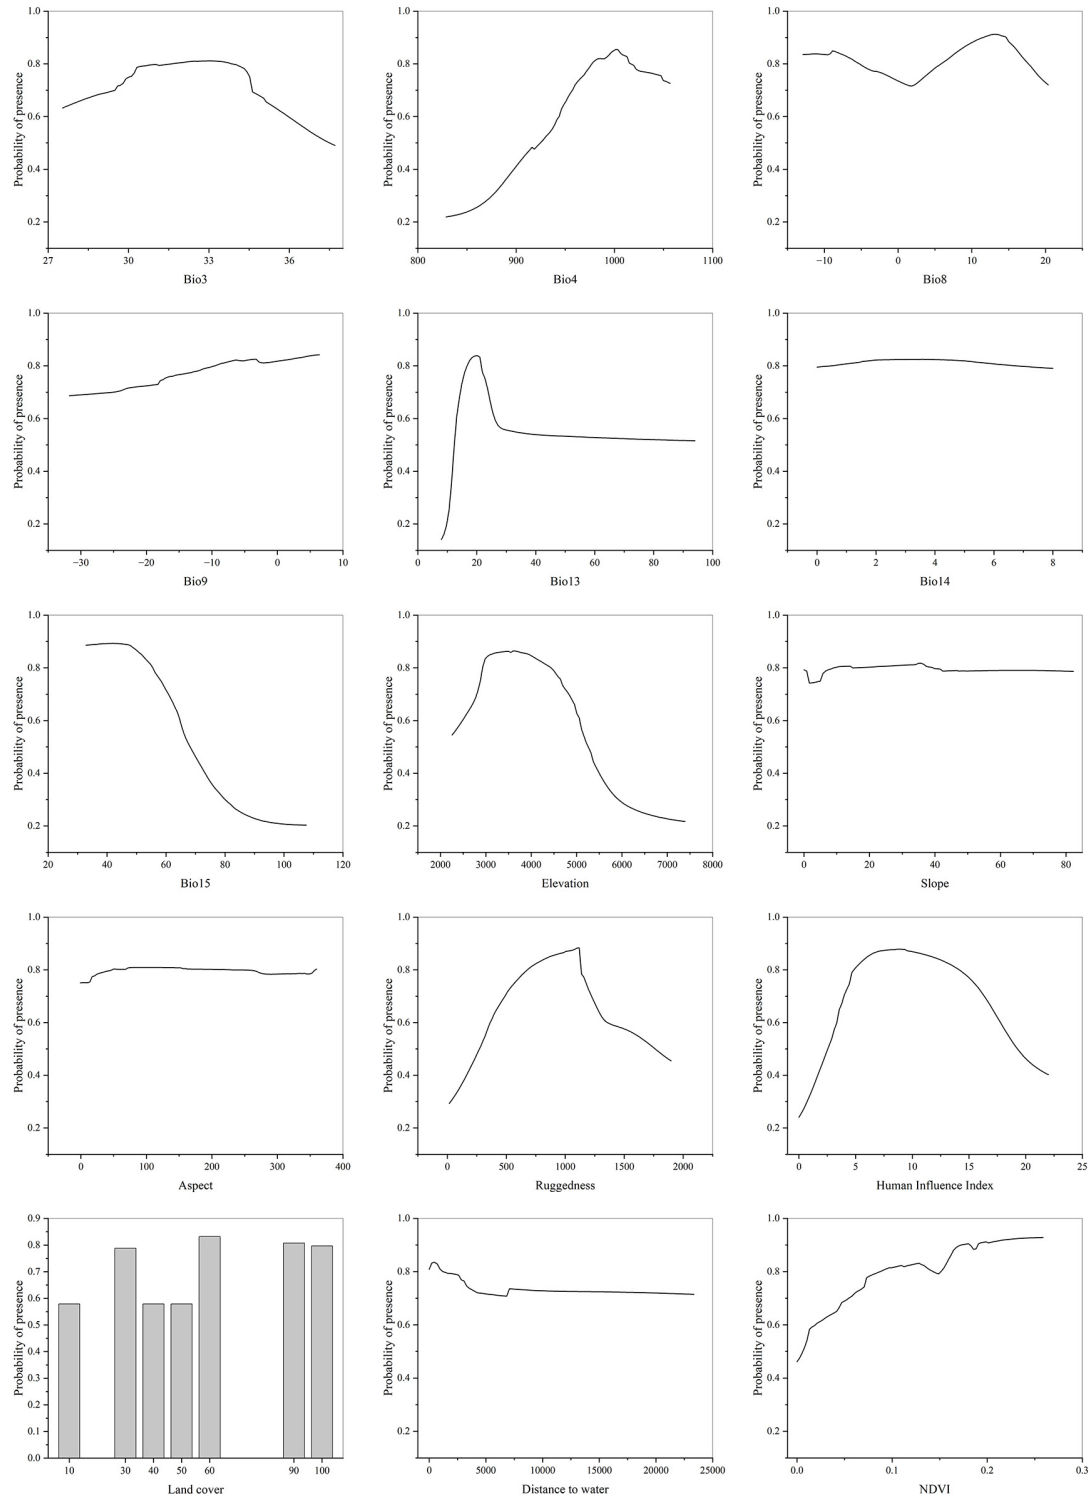

**Figure S1.** Response curves of the current ensemble species distribution models for Siberian ibex in Taxkorgan Nature Reserve to each variable. Y-axis represents the probability of presence of prediction.

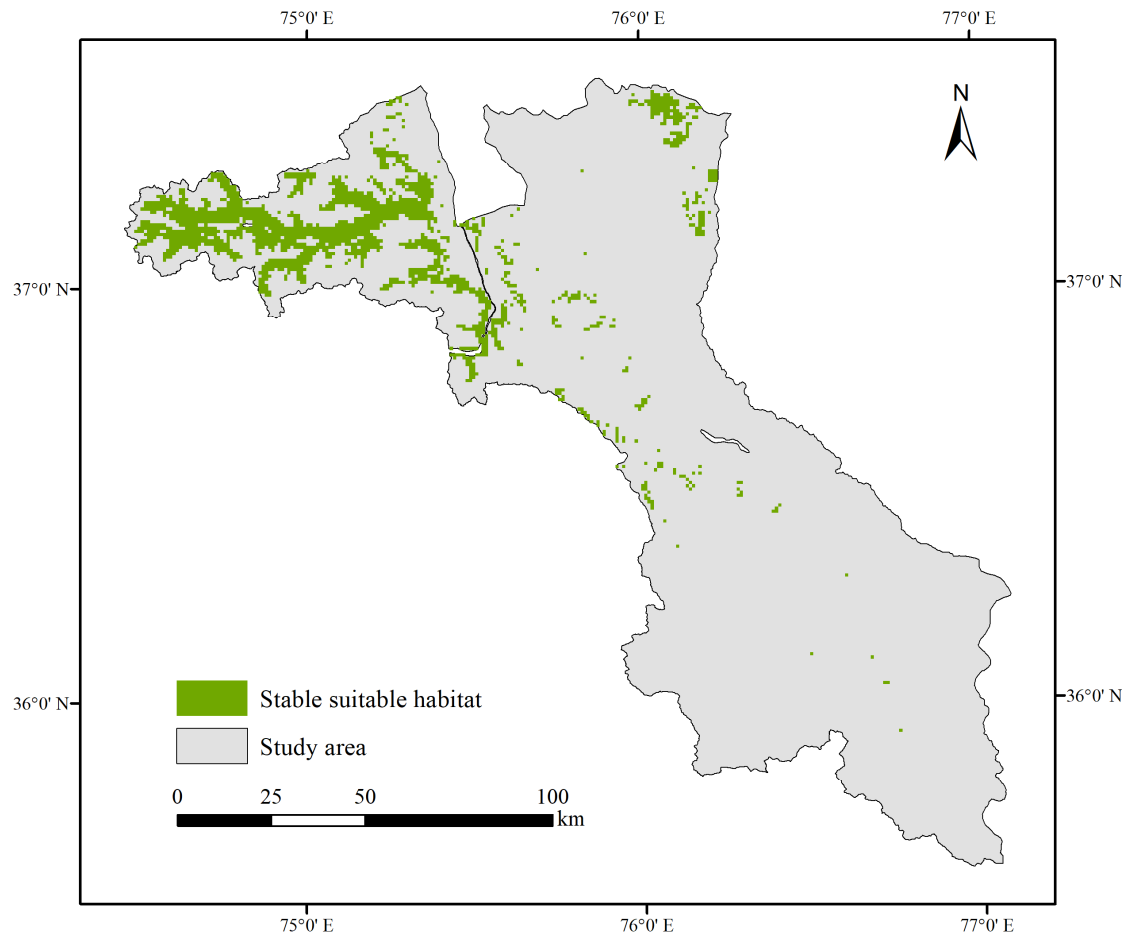

**Figure S2.** Stable suitable habitat for Siberian ibex in Taxkorgan Nature Reserve under climate change.
